# Supplementary material for: Abnormal Mitochondrial Function and Impaired Granulosa Cell Differentiation in Androgen Receptor Knockout Mice
Source: PubMed Central journal article supplement (PMC4463620; doi:10.3390/ijms16059831), 2015-04-30
Supplement: ijms-16-09831-s001.pdf [file ijms-16-09831-s001.pdf]

## Supplementary Information

(A)

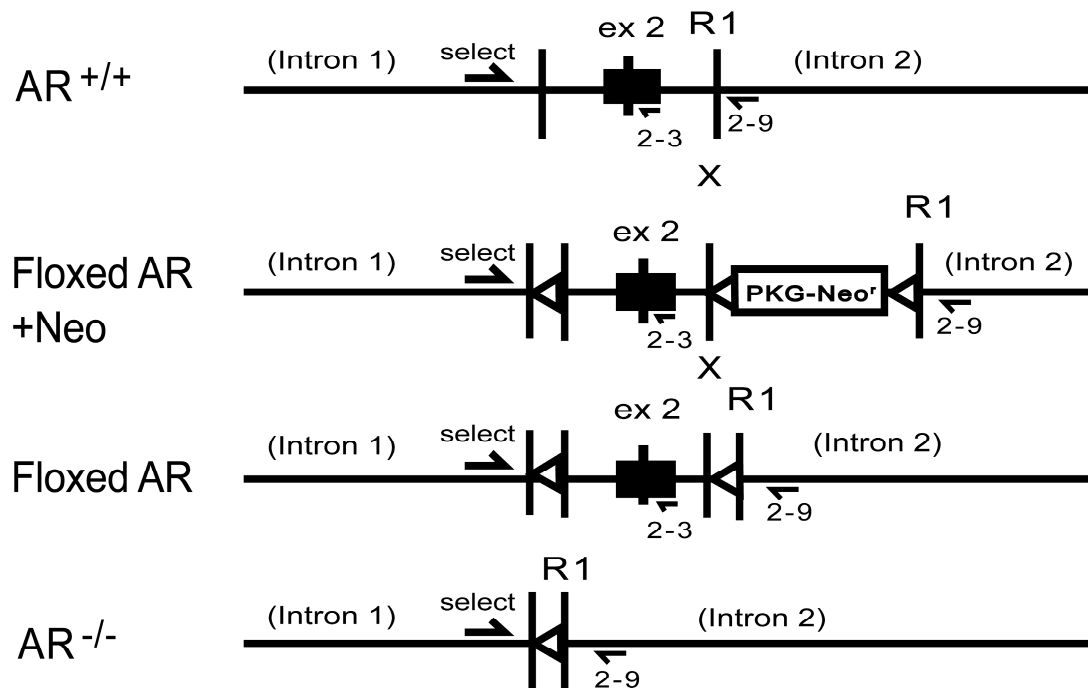

(B)

| Genotype | ACTB | Primer       | PCR product size |
|----------|------|--------------|------------------|
| -/Y      |      | Select & 2-9 | 238 bp           |
| -/X      |      | Select & 2-9 | 238 & 580 bp     |
| X/Y      |      | Select & 2-9 | 580 bp           |
| X/X      |      | Select & 2-9 | 580 bp           |

**Figure S1.** Genotyping of  $AR^{-/-}$  mice. We have used the primers “select” and “2–9” to identify  $AR^{+/+}$  and  $AR^{-/-}$  female mice in our study. **(A)** Schematic presentation of the DNA construct and primer location in exon 2 area of  $AR^{+/+}$ ,  $AR^{-/-}$ , and floxed  $AR$  genes; **(B)** List of the sizes of PCR product amplified by designed primer pairs.
